# Supplementary material for: Genome-Wide Identification of the NAC Transcription Factors in Gossypium hirsutum and Analysis of Their Responses to Verticillium wilt
Source: MDPI journal article supplement (doi:10.3390/plants11192661), 2022-10-10
Supplement: s1 [file s1]

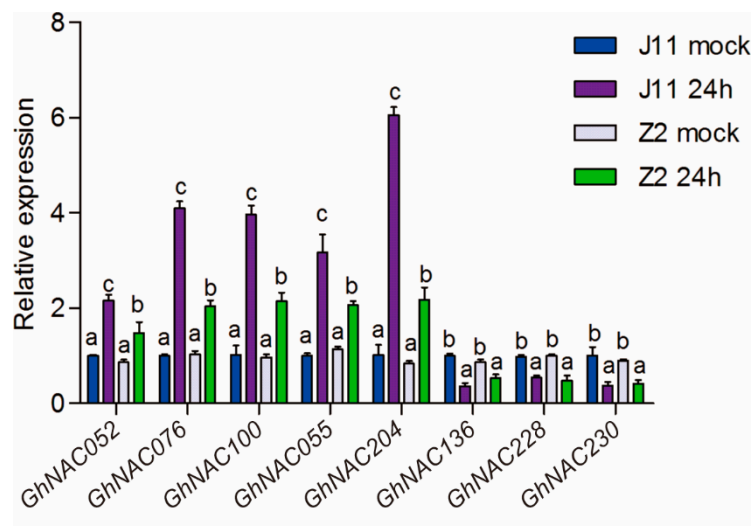

Figure S1. qRT-PCR validation of selected *GhNACs*. *GhUBQ7* is used as an internal reference gene and data are means  $\pm$  SD from three biological replicates. Different letters indicate significant differences,  $p < 0.05$  (ANOVA test).

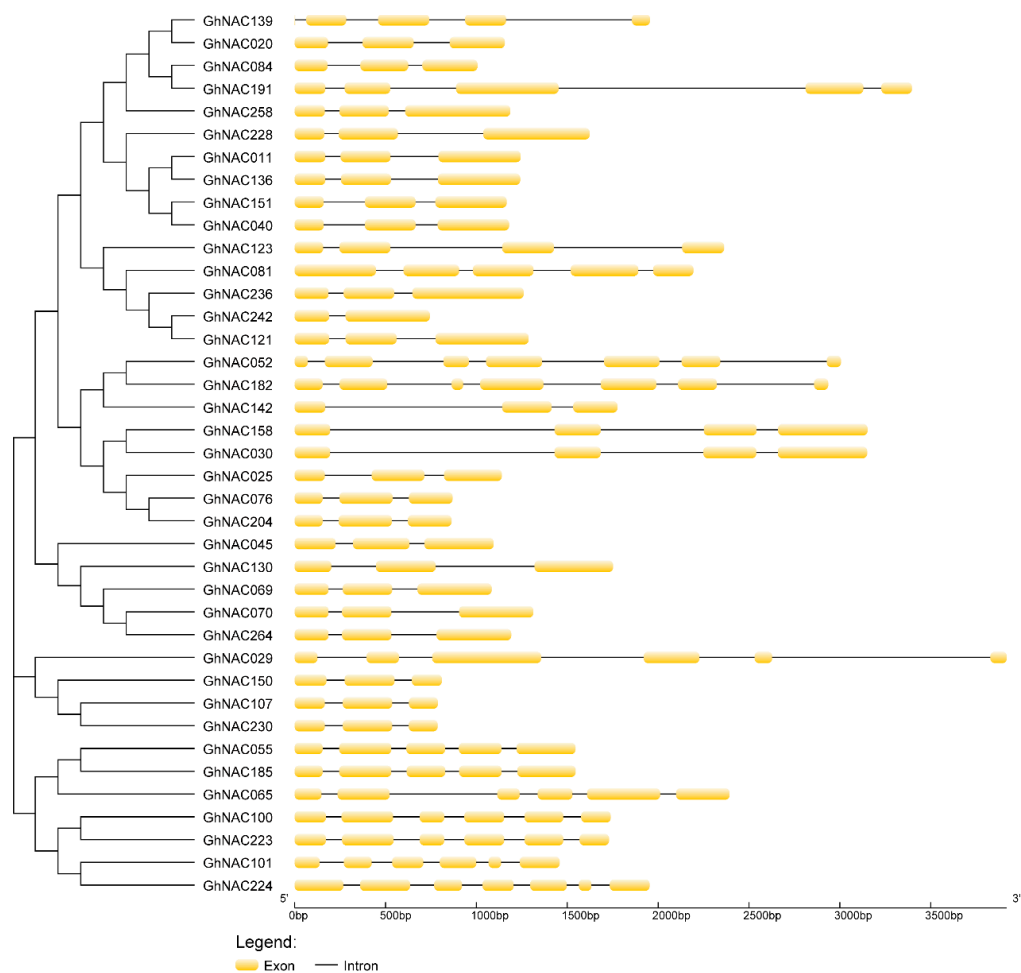

Figure S2. Exon-intron structure analysis of DEGs in putative *GhNACs*. Phylogenetic tree of DEGs constructed with MEGA 7.0 by the NJ method.

Bootstrap values from 1000 replicates are indicated at each branch.

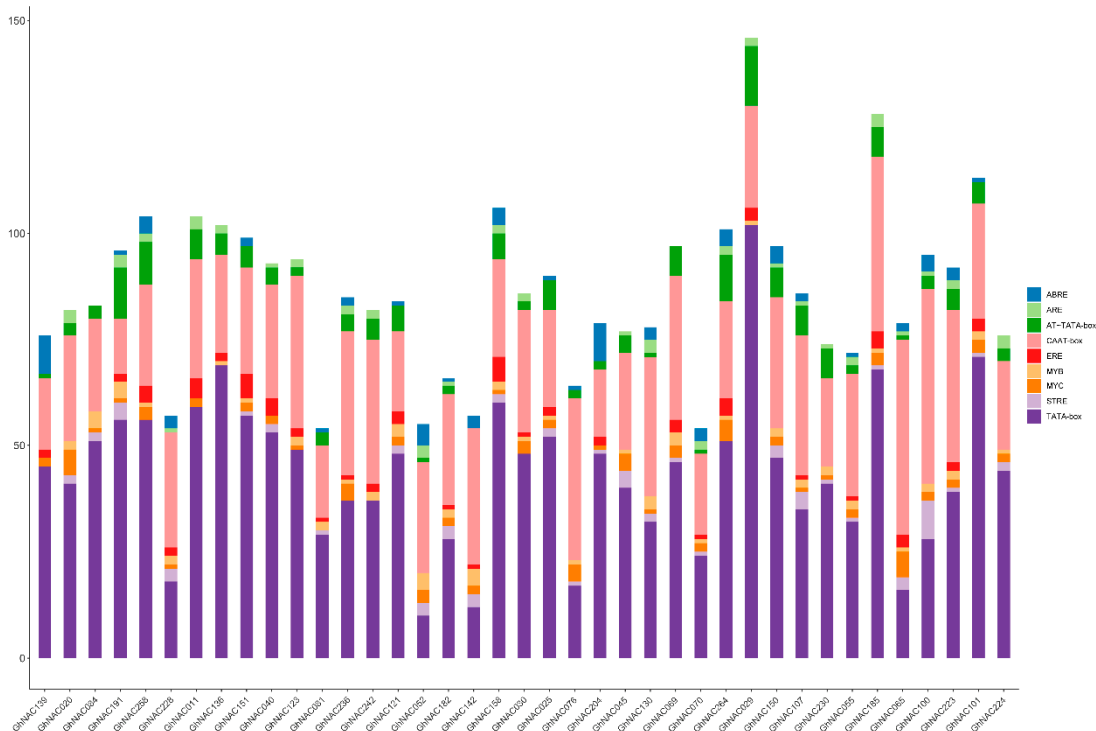

Figure S3. cis-Element analysis of DEGs in putative *GhNACs* promoters. Different cis-elements with the same or similar functions are shown in the same color.
