# Supplementary material for: Genome-Wide Identification of the NAC Transcription Factors in Gossypium hirsutum and Analysis of Their Responses to Verticillium wilt
Source: Plants (Basel). 2022 Oct 10;11(19):2661. doi: 10.3390/plants11192661 (PMC9571985; doi:10.3390/plants11192661)
Supplement: Supplementary file 1 [file plants-11-02661-s001.zip]

Archive with 9 entries (9 files):
- fig.S1 qRT-PCR validation of selected GhNACs.tif
- figS2 Exon-intron structure analysis of DEGs in putative GhNACs.tif
- figS3 cis-Element analysis of DEGs in putative GhNACs promoters.tif
- figure S1-S3.pdf
- Table S1 The GhNAC gene family in G. hirsutum L.xlsx
- Table S2 Segmental and tandem duplications of GhNAC gene pairs.xlsx
- Table S3 Summary of transcriptome sequencing results after filtering.docx
- Table S4 GhNACs differentially expressed in J11 and Z2.xlsx
- Table S5 Primers used in the study.xlsx
