# Supplementary material for: Genome-Wide Identification of the NAC Transcription Factors in Gossypium hirsutum and Analysis of Their Responses to Verticillium wilt
Source: Plants (Basel). 2022 Oct 10;11(19):2661. doi: 10.3390/plants11192661 (PMC9571985; doi:10.3390/plants11192661)
Supplement: Supplementary file 1 [file plants-11-02661-s001.zip › Table S1 The GhNAC gene family in G. hirsutum L.xlsx]

## Sheet: Gh_NAC
Supplementary Table S1. The GhNAC gene family in G. hirsutum L.
Gene ID	ID	Group	Chromosome	Chromosome start	Chromosome end	Exon number	CDS length (bp)	Protein Length (aa)	Molecular Weight (kDa)	Charge	Isoelectric Point	Grand Average of Hydropathy
Gh_A04G1143	GhNAC028	III	A04	61709595	61710136	2	Gossypium hirsutum	156	17.246	12	10.278	-0.208
Gh_D11G0405	GhNAC218	II	D11	3390447	3391078	2	Gossypium hirsutum	157	18.101	8	9.915	-0.455
Gh_A12G0557	GhNAC109	IV	A12	13713458	13714076	2	Gossypium hirsutum	154	18.259	4.5	8.876	-0.863
Gh_D12G0574	GhNAC232	IV	D12	10642291	10642913	2	Gossypium hirsutum	154	18.27	6.5	9.445	-0.832
Gh_A13G1020	GhNAC122	IV	A13	56948704	56949697	3	Gossypium hirsutum	179	20.658	10	9.667	-0.617
Gh_A11G0348	GhNAC094	II	A11	3191650	3195322	3	Gossypium hirsutum	186	21.42	9.5	10.03	-0.707
Gh_A13G1439	GhNAC126	III	A13	72071713	72072416	2	Gossypium hirsutum	188	21.479	19	10.284	-0.536
Gh_D08G2683	GhNAC266	IX	scaffold4251_D08	44919	46628	3	Gossypium hirsutum	183	21.777	9.5	9.064	-0.432
Gh_A06G1759	GhNAC047	IX	A06	102681948	102682607	2	Gossypium hirsutum	190	21.942	-4.5	4.998	-0.859
Gh_A06G1758	GhNAC046	IX	A06	102676092	102676751	2	Gossypium hirsutum	190	21.942	-4.5	5.004	-0.832
Gh_A08G1953	GhNAC066	IX	A08	100606892	100608641	3	Gossypium hirsutum	183	21.99	13	9.491	-0.433
Gh_D13G1271	GhNAC243	IV	D13	39025301	39026298	3	Gossypium hirsutum	192	22.3	10.5	9.593	-0.569
Gh_D02G1981	GhNAC140	IX	D02	63783746	63785085	3	Gossypium hirsutum	195	22.445	-6.5	4.73	-0.783
Gh_D12G0132	GhNAC230	IX	D12	1702825	1703611	3	Gossypium hirsutum	198	22.764	-9	4.598	-0.726
Gh_A12G0118	GhNAC107	IX	A12	1663938	1664725	3	Gossypium hirsutum	198	22.812	-9	4.598	-0.756
Gh_D04G1974	GhNAC262	I	scaffold3970_D04	1022989	1024124	3	Gossypium hirsutum	201	22.853	-1.5	6.159	-0.696
Gh_A13G0575	GhNAC119	IX	A13	13501744	13503160	3	Gossypium hirsutum	200	22.864	-4	5.581	-0.787
Gh_D06G2219	GhNAC177	IX	D06	63832967	63833657	2	Gossypium hirsutum	201	23.28	-4.5	5.026	-0.784
Gh_A05G2928	GhNAC038	X	A05	70932723	70934364	3	Gossypium hirsutum	206	23.402	10.5	9.758	-0.543
Gh_D04G0712	GhNAC154	X	D04	14435509	14437355	3	Gossypium hirsutum	206	23.464	8.5	9.199	-0.528
Gh_A05G3322	GhNAC041	IX	A05	86921909	86922768	3	Gossypium hirsutum	202	23.476	-4	5.577	-0.534
Gh_A04G0422	GhNAC024	V	A04	13021480	13026658	3	Gossypium hirsutum	203	23.612	8	9.263	-0.633
Gh_A09G1149	GhNAC079	III	A09	62944922	62946272	3	Gossypium hirsutum	208	23.667	-1	6.136	-0.783
Gh_D04G0278	GhNAC150	IX	D04	4180518	4181327	3	Gossypium hirsutum	204	23.71	-5.5	5.306	-0.478
Gh_D13G1072	GhNAC242	V	D13	29914597	29915340	2	Gossypium hirsutum	217	24.523	-2.5	5.683	NA
Gh_D05G3197	GhNAC166	V	D05	49472095	49476092	3	Gossypium hirsutum	223	25.74	8	9.094	-0.577
Gh_A09G0913	GhNAC076	I	A09	57912121	57912989	3	Gossypium hirsutum	228	25.84	0	6.52	-0.544
Gh_D09G0943	GhNAC204	I	D09	34949600	34950462	3	Gossypium hirsutum	228	25.84	0	6.52	-0.565
Gh_D03G0032	GhNAC142	I	D03	230441	232216	3	Gossypium hirsutum	227	26.317	3	7.585	-0.592
Gh_A02G1687	GhNAC015	I	A02	83122591	83124515	3	Gossypium hirsutum	227	26.39	3.5	7.299	-0.65
Gh_A01G2142	GhNAC248	I	scaffold186_A01	5666	7009	3	Gossypium hirsutum	232	27.12	4.5	8.428	-0.79
Gh_A09G1559	GhNAC080	VI	A09	68928192	68930051	3	Gossypium hirsutum	239	27.438	-9	4.608	-0.714
Gh_D09G1631	GhNAC207	VI	D09	43922884	43924755	3	Gossypium hirsutum	239	27.494	-9	4.608	-0.715
Gh_A01G0131	GhNAC003	IX	A01	1227081	1227818	1	Gossypium hirsutum	245	27.502	-8.5	4.655	-0.53
Gh_D01G0012	GhNAC127	I	D01	61828	62790	3	Gossypium hirsutum	239	27.556	9	9.539	-0.662
Gh_A05G3023	GhNAC039	III	A05	77364503	77365748	3	Gossypium hirsutum	241	27.592	9	9.504	-0.886
Gh_D10G2514	GhNAC267	III	scaffold4401_D10	79749	80650	3	Gossypium hirsutum	242	27.682	4.5	8.425	-0.677
Gh_D07G2341	GhNAC187	X	D07	54992502	54993411	3	Gossypium hirsutum	245	27.825	14.5	10.03	-0.54
Gh_A07G2132	GhNAC057	X	A07	77931096	77932005	3	Gossypium hirsutum	245	27.937	13.5	10.042	-0.553
Gh_A10G0627	GhNAC084	X	A10	10043154	10044159	3	Gossypium hirsutum	248	28.151	11.5	9.268	-0.521
Gh_D10G0772	GhNAC211	X	D10	9190022	9191004	3	Gossypium hirsutum	248	28.234	11.5	9.087	-0.572
Gh_D07G1086	GhNAC181	I	D07	15775597	15776529	3	Gossypium hirsutum	246	28.361	-2.5	5.723	-0.747
Gh_A07G1009	GhNAC051	I	A07	19519708	19520640	3	Gossypium hirsutum	246	28.37	0.5	6.687	-0.767
Gh_A07G0558	GhNAC049	VI	A07	7757970	7762557	3	Gossypium hirsutum	247	28.42	-10	4.558	-0.774
Gh_D07G0624	GhNAC179	VI	D07	7263001	7267435	3	Gossypium hirsutum	247	28.449	-11	4.498	-0.792
Gh_D04G0624	GhNAC153	III	D04	11229308	11230588	3	Gossypium hirsutum	249	28.502	11.5	9.758	-0.806
Gh_A04G0868	GhNAC027	II	A04	56178080	56179021	3	Gossypium hirsutum	254	28.863	12.5	9.672	-0.676
Gh_D04G1368	GhNAC156	II	D04	44498960	44499902	3	Gossypium hirsutum	254	28.88	10.5	9.233	-0.662
Gh_A03G1332	GhNAC020	II	A03	91603494	91604649	3	Gossypium hirsutum	255	29.034	12.5	9.364	-0.66
Gh_A03G1333	GhNAC021	II	A03	91651610	91652838	3	Gossypium hirsutum	256	29.144	11.5	9.528	-0.716
Gh_A04G0481	GhNAC025	I	A04	24629961	24631100	3	Gossypium hirsutum	257	29.3	3.5	7.533	-0.662
Gh_A11G3079	GhNAC260	V	scaffold2747_A11	11966	16087	3	Gossypium hirsutum	254	29.333	3	6.883	-0.614
Gh_D11G3512	GhNAC270	V	scaffold4562_D11	106637	111115	3	Gossypium hirsutum	254	29.333	3	6.883	-0.614
Gh_D02G0187	GhNAC134	IX	D02	2087405	2091712	3	Gossypium hirsutum	254	29.599	-6	5.2	-0.764
Gh_A10G0263	GhNAC082	III	A10	2321501	2322446	3	Gossypium hirsutum	263	29.636	-2	5.97	-0.491
Gh_D10G0263	GhNAC210	III	D10	2273318	2274263	3	Gossypium hirsutum	263	29.672	-4	5.388	-0.406
Gh_A02G0150	GhNAC009	IX	A02	1588178	1591942	3	Gossypium hirsutum	257	30.292	-5	5.402	-0.82
Gh_A09G0040	GhNAC071	III	A09	930228	932623	3	Gossypium hirsutum	260	30.595	-9	4.758	-0.915
Gh_D09G0038	GhNAC199	III	D09	1004352	1006725	3	Gossypium hirsutum	260	30.657	-9	4.758	-0.973
Gh_D08G2049	GhNAC194	V	D08	59152297	59155465	3	Gossypium hirsutum	268	30.964	-2	6.178	-0.667
Gh_A08G1691	GhNAC064	V	A08	96599056	96602414	3	Gossypium hirsutum	268	31.019	-3	5.993	-0.685
Gh_D02G1769	GhNAC139	II	D02	60221777	60223731	5	Gossypium hirsutum	275	31.04	17.5	9.926	-0.524
Gh_A05G1766	GhNAC034	IX	A05	18622667	18624765	3	Gossypium hirsutum	277	31.177	3	7.219	-0.457
Gh_D11G0285	GhNAC216	VI	D11	2454449	2455960	3	Gossypium hirsutum	276	31.537	-1	6.253	-0.686
Gh_A11G0266	GhNAC092	VI	A11	2487087	2488540	3	Gossypium hirsutum	276	31.57	-1	6.151	-0.693
Gh_D05G1960	GhNAC162	IX	D05	18037426	18039498	3	Gossypium hirsutum	281	31.595	2.5	7.003	-0.453
Gh_A05G3310	GhNAC040	III	A05	86644883	86646062	3	Gossypium hirsutum	276	31.932	-1.5	6.064	-0.704
Gh_D04G0293	GhNAC151	III	D04	4405030	4406196	3	Gossypium hirsutum	276	32.018	-2.5	5.744	-0.725
Gh_A07G1402	GhNAC054	V	A07	38822587	38826699	3	Gossypium hirsutum	279	32.244	-4.5	5.757	-0.594
Gh_D07G1502	GhNAC184	V	D07	26983276	26987399	3	Gossypium hirsutum	279	32.304	-4.5	5.757	-0.586
Gh_A01G0013	GhNAC001	I	A01	83512	84586	3	Gossypium hirsutum	279	32.357	7	9.212	-0.592
Gh_A08G2055	GhNAC068	I	A08	101753825	101755167	3	Gossypium hirsutum	285	32.411	-2	5.993	-0.685
Gh_D12G2767	GhNAC271	III	scaffold4592_D12	24309	25366	3	Gossypium hirsutum	281	32.493	4.5	8.168	-0.779
Gh_A12G1505	GhNAC112	III	A12	74566000	74567056	3	Gossypium hirsutum	281	32.532	4.5	8.168	-0.77
Gh_D08G2670	GhNAC263	I	scaffold4249_D08	34558	35635	3	Gossypium hirsutum	286	32.602	-2.5	6.05	-0.739
Gh_D02G2283	GhNAC141	I	D02	66597694	66598921	3	Gossypium hirsutum	281	32.612	5.5	8.341	-0.704
Gh_D12G1407	GhNAC234	XI	D12	43300582	43302096	3	Gossypium hirsutum	288	32.684	18	9.322	-0.849
Gh_A12G1285	GhNAC111	XI	A12	68178702	68180223	3	Gossypium hirsutum	288	32.73	18	9.301	-0.842
Gh_A03G1843	GhNAC022	I	A03	99511386	99512619	3	Gossypium hirsutum	281	32.747	6	8.66	-0.694
Gh_A08G2056	GhNAC069	I	A08	101763312	101764395	3	Gossypium hirsutum	288	32.962	-1.5	6.245	-0.764
Gh_D07G1330	GhNAC183	IV	D07	21349734	21351007	4	Gossypium hirsutum	287	32.966	2	6.924	-0.793
Gh_A03G0887	GhNAC019	III	A03	56911513	56912581	3	Gossypium hirsutum	286	33.083	4	8.371	-0.822
Gh_A08G2057	GhNAC070	I	A08	101767629	101768941	3	Gossypium hirsutum	288	33.093	-1	6.318	-0.796
Gh_D02G1270	GhNAC138	III	D02	41788944	41790005	3	Gossypium hirsutum	286	33.131	6	8.875	-0.83
Gh_D08G2671	GhNAC264	I	scaffold4249_D08	38636	39827	3	Gossypium hirsutum	289	33.178	-2	6.111	-0.797
Gh_A12G0319	GhNAC108	I	A12	5752771	5753848	3	Gossypium hirsutum	291	33.666	2.5	7.498	-0.731
Gh_D05G3221	GhNAC167	I	D05	50140546	50143670	3	Gossypium hirsutum	300	33.789	6	8.203	-0.567
Gh_D06G0417	GhNAC170	III	D06	5977300	5978799	3	Gossypium hirsutum	299	33.817	0	6.515	-0.658
Gh_A04G0414	GhNAC023	I	A04	12309040	12312122	3	Gossypium hirsutum	300	33.822	3.5	7.468	-0.589
Gh_A07G1948	GhNAC056	V	A07	75262817	75266449	3	Gossypium hirsutum	293	33.828	-5.5	5.827	-0.737
Gh_A06G1910	GhNAC253	III	scaffold1269_A06	23357	24888	3	Gossypium hirsutum	299	33.878	0.5	6.627	-0.644
Gh_D02G0790	GhNAC136	III	D02	12909272	12910512	3	Gossypium hirsutum	298	33.883	1.5	7.006	-0.581
Gh_D07G2165	GhNAC186	V	D07	52151115	52154815	3	Gossypium hirsutum	293	33.905	-2	6.32	-0.743
Gh_D12G0347	GhNAC231	I	D12	5024833	5025913	3	Gossypium hirsutum	292	33.906	0	6.54	-0.707
Gh_A02G0749	GhNAC011	III	A02	13951657	13952900	3	Gossypium hirsutum	298	33.945	0	6.52	-0.531
Gh_D08G2669	GhNAC265	I	scaffold4249_D08	24323	25744	3	Gossypium hirsutum	300	34.057	-3	5.712	-0.67
Gh_D06G1417	GhNAC174	XI	D06	45672953	45674381	3	Gossypium hirsutum	306	34.252	14	9.039	-0.78
Gh_A06G2028	GhNAC255	XI	scaffold1341_A06	291175	292604	3	Gossypium hirsutum	306	34.341	14.5	9.039	-0.767
Gh_A03G0506	GhNAC017	IV	A03	12155624	12157214	3	Gossypium hirsutum	294	34.429	6.5	7.433	-0.817
Gh_D03G1021	GhNAC146	IV	D03	34752815	34754411	3	Gossypium hirsutum	294	34.552	7.5	7.673	-0.819
Gh_A11G0932	GhNAC101	IX	A11	9986334	9987791	6	Gossypium hirsutum	316	35.051	-22	4.325	-0.78
Gh_D01G0249	GhNAC129	V	D01	2164375	2169260	3	Gossypium hirsutum	314	35.12	-1.5	6.162	-0.488
Gh_D06G1546	GhNAC175	I	D06	51448389	51449481	3	Gossypium hirsutum	305	35.239	7.5	8.777	-0.626
Gh_A06G1226	GhNAC045	I	A06	88396104	88397198	3	Gossypium hirsutum	305	35.313	9.5	9.17	-0.648
Gh_A06G0970	GhNAC044	V	A06	44015152	44016778	3	Gossypium hirsutum	321	35.863	9	9.172	-0.667
Gh_D06G1146	GhNAC172	V	D06	26519902	26521524	3	Gossypium hirsutum	321	35.924	9	9.172	-0.664
Gh_A02G1625	GhNAC014	IV	A02	82721992	82724024	3	Gossypium hirsutum	314	35.963	-5	5.166	-0.702
Gh_A09G0474	GhNAC074	V	A09	37873456	37874845	3	Gossypium hirsutum	322	35.97	5	8.296	-0.507
Gh_D05G1508	GhNAC159	XI	D05	13575197	13576990	3	Gossypium hirsutum	321	36.009	16.5	9.54	-0.764
Gh_D13G1327	GhNAC244	VI	D13	41782173	41784576	4	Gossypium hirsutum	317	36.012	-9	4.843	-0.736
Gh_A13G1061	GhNAC123	VI	A13	60218848	60221210	4	Gossypium hirsutum	317	36.022	-8	4.917	-0.722
Gh_D09G0716	GhNAC203	III	D09	31237441	31240039	3	Gossypium hirsutum	313	36.03	1.5	6.781	-0.593
Gh_D03G0096	GhNAC143	IV	D03	706802	708849	3	Gossypium hirsutum	314	36.035	-4	5.325	-0.716
Gh_A05G1339	GhNAC031	XI	A05	13698969	13700774	3	Gossypium hirsutum	321	36.11	16	9.514	-0.77
Gh_A11G0633	GhNAC098	V	A11	6101596	6102765	3	Gossypium hirsutum	318	36.112	5.5	8.256	-0.595
Gh_D09G0480	GhNAC202	V	D09	23360064	23361457	3	Gossypium hirsutum	323	36.135	5	8.296	-0.511
Gh_A09G0703	GhNAC075	III	A09	52670309	52672943	3	Gossypium hirsutum	315	36.138	-1	6.343	-0.591
Gh_D11G0743	GhNAC221	V	D11	6405929	6407098	3	Gossypium hirsutum	318	36.216	5.5	8.256	-0.585
Gh_A06G1947	GhNAC254	I	scaffold1316_A06	10224	13446	3	Gossypium hirsutum	309	36.252	2	6.794	-0.842
Gh_A01G0267	GhNAC005	I	A01	2786573	2788315	3	Gossypium hirsutum	319	36.28	11	9.025	-0.639
Gh_D01G0278	GhNAC130	I	D01	2687978	2689729	3	Gossypium hirsutum	320	36.388	10.5	9.009	-0.658
Gh_D06G2096	GhNAC176	I	D06	62853444	62856620	3	Gossypium hirsutum	315	36.829	-1	6.379	-0.824
Gh_A13G0828	GhNAC121	V	A13	39751109	39752396	3	Gossypium hirsutum	327	37.006	-5.5	5.281	-0.643
Gh_A01G0497	GhNAC007	III	A01	7953380	7954596	3	Gossypium hirsutum	335	37.064	6.5	8.585	-0.731
Gh_D01G2346	GhNAC261	III	scaffold3720_D01	52748	53962	3	Gossypium hirsutum	335	37.085	7	8.598	-0.774
Gh_D12G2088	GhNAC237	VI	D12	53905186	53906510	4	Gossypium hirsutum	326	37.188	-2.5	5.747	-0.765
Gh_D08G2446	GhNAC197	VI	D08	64348629	64351919	4	Gossypium hirsutum	323	37.199	-11	4.741	-0.796
Gh_A08G2288	GhNAC257	VI	scaffold1922_A08	60463	63634	4	Gossypium hirsutum	323	37.209	-11	4.741	-0.796
Gh_A12G1908	GhNAC115	VI	A12	81678311	81679694	4	Gossypium hirsutum	326	37.226	-4	5.457	-0.739
Gh_A10G2022	GhNAC089	III	A10	98006134	98007293	3	Gossypium hirsutum	328	37.35	-4.5	5.459	-0.599
Gh_D03G1627	GhNAC148	VI	D03	46276044	46278306	4	Gossypium hirsutum	327	37.351	-2.5	6.044	-0.697
Gh_A10G2023	GhNAC090	III	A10	98025515	98026674	3	Gossypium hirsutum	328	37.378	-4.5	5.459	-0.6
Gh_A03G0024	GhNAC016	VI	A03	368064	370402	4	Gossypium hirsutum	328	37.473	-7.5	4.993	-0.709
Gh_A11G0290	GhNAC093	V	A11	2691349	2692531	3	Gossypium hirsutum	332	37.496	9	8.452	-0.563
Gh_D11G0347	GhNAC217	V	D11	2963055	2964238	3	Gossypium hirsutum	332	37.738	8	8.343	-0.603
Gh_D05G1549	GhNAC160	III	D05	14005969	14007157	3	Gossypium hirsutum	340	37.905	11	9.706	-0.69
Gh_A11G0613	GhNAC097	XI	A11	5891272	5893092	6	Gossypium hirsutum	332	37.993	19	9.473	-0.798
Gh_D04G0450	GhNAC152	I	D04	7272851	7274007	3	Gossypium hirsutum	332	38.093	4	7.304	-0.544
Gh_A05G1381	GhNAC032	III	A05	14212728	14213924	3	Gossypium hirsutum	343	38.166	11	9.706	-0.668
Gh_A04G1303	GhNAC252	III	scaffold753_A04	95527	97178	3	Gossypium hirsutum	341	38.268	8	9.124	-0.599
Gh_D05G3474	GhNAC168	III	D05	56998921	57000549	3	Gossypium hirsutum	342	38.337	7.5	8.988	-0.562
Gh_D11G0608	GhNAC220	VII	D11	5305931	5306974	1	Gossypium hirsutum	347	38.363	-13.5	4.542	-0.399
Gh_A07G0739	GhNAC050	I	A07	11517319	11522504	3	Gossypium hirsutum	332	38.377	14	8.46	-0.921
Gh_D08G1721	GhNAC192	VI	D08	53339636	53341120	4	Gossypium hirsutum	338	38.387	-3.5	5.685	-0.792
Gh_D01G0514	GhNAC132	III	D01	6360473	6361691	3	Gossypium hirsutum	346	38.436	7	9.009	-0.573
Gh_A08G2289	GhNAC258	IV	scaffold1922_A08	74424	75610	3	Gossypium hirsutum	338	38.454	8	7.537	-0.799
Gh_A08G1428	GhNAC062	VI	A08	89972924	89974400	4	Gossypium hirsutum	338	38.525	-0.5	6.403	-0.787
Gh_D05G3475	GhNAC169	III	D05	57073903	57075101	3	Gossypium hirsutum	345	38.559	1.5	6.805	-0.788
Gh_D07G0802	GhNAC180	I	D07	10191313	10196481	3	Gossypium hirsutum	334	38.644	14.5	8.464	-0.895
Gh_A01G2064	GhNAC249	III	scaffold38_A01	51412	52641	3	Gossypium hirsutum	348	38.645	8	9.053	-0.575
Gh_A11G0524	GhNAC096	VII	A11	4921702	4922748	1	Gossypium hirsutum	348	38.727	-15.5	4.467	-0.455
Gh_A04G1299	GhNAC251	III	scaffold752_A04	51937	53138	3	Gossypium hirsutum	346	38.817	4.5	7.829	-0.838
Gh_D13G1526	GhNAC245	III	D13	47191736	47192980	3	Gossypium hirsutum	349	38.897	8.5	8.644	-0.753
Gh_A13G1229	GhNAC124	III	A13	65700454	65701705	3	Gossypium hirsutum	349	38.903	8.5	8.774	-0.778
Gh_A13G1259	GhNAC125	V	A13	66663035	66665075	3	Gossypium hirsutum	352	39.008	0.5	6.602	-0.506
Gh_A07G0349	GhNAC048	IV	A07	4514522	4515612	2	Gossypium hirsutum	335	39.01	5.5	7.251	-0.797
Gh_D13G1561	GhNAC246	V	D13	47968121	47970195	3	Gossypium hirsutum	352	39.013	1.5	6.786	-0.518
Gh_D07G0411	GhNAC178	IV	D07	4511271	4512361	2	Gossypium hirsutum	335	39.151	3.5	6.927	-0.812
Gh_A11G2580	GhNAC106	V	A11	86109870	86111602	3	Gossypium hirsutum	357	39.384	4.5	7.673	-0.481
Gh_A01G0440	GhNAC006	V	A01	7017621	7019632	3	Gossypium hirsutum	359	39.479	5.5	7.99	-0.517
Gh_A11G2165	GhNAC104	V	A11	71968309	71969683	3	Gossypium hirsutum	348	39.48	4	7.494	-0.726
Gh_D11G2467	GhNAC227	V	D11	50217077	50218439	3	Gossypium hirsutum	349	39.495	3	7.189	-0.72
Gh_A09G1062	GhNAC078	III	A09	61163751	61164952	3	Gossypium hirsutum	340	39.555	-6.5	5.002	-0.912
Gh_D11G2947	GhNAC229	V	D11	60077928	60079666	3	Gossypium hirsutum	357	39.555	4.5	7.671	-0.462
Gh_D01G0448	GhNAC131	V	D01	5343860	5345867	3	Gossypium hirsutum	359	39.615	6	8	-0.541
Gh_D09G1069	GhNAC206	III	D09	36888633	36889841	3	Gossypium hirsutum	343	39.74	-7.5	4.917	-0.863
Gh_A07G1226	GhNAC053	IV	A07	27832699	27834125	3	Gossypium hirsutum	349	39.775	-1	6.348	-0.719
Gh_D04G1097	GhNAC155	III	D04	36386278	36387537	3	Gossypium hirsutum	348	39.799	1.5	6.861	-0.728
Gh_D08G2447	GhNAC198	IV	D08	64361926	64363232	4	Gossypium hirsutum	351	39.889	10	7.818	-0.79
Gh_A04G0634	GhNAC026	III	A04	43940372	43941628	3	Gossypium hirsutum	348	39.91	2.5	7.137	-0.682
Gh_D11G2469	GhNAC228	III	D11	50253492	50255114	3	Gossypium hirsutum	357	40.096	5.5	8.185	-0.644
Gh_D11G1793	GhNAC226	IV	D11	20186781	20188688	3	Gossypium hirsutum	348	40.113	-8	5.086	-0.811
Gh_A11G1635	GhNAC103	IV	A11	24410745	24412633	3	Gossypium hirsutum	348	40.262	-9	5.005	-0.774
Gh_D13G1759	GhNAC247	III	D13	52385038	52386382	3	Gossypium hirsutum	356	40.326	8.5	8.855	-0.627
Gh_A12G1620	GhNAC114	V	A12	77469813	77471085	3	Gossypium hirsutum	358	40.57	6	8.006	-0.588
Gh_D12G1761	GhNAC236	V	D12	50033185	50034444	3	Gossypium hirsutum	358	40.59	6	8.006	-0.581
Gh_D10G2317	GhNAC213	III	D10	61393303	61394530	3	Gossypium hirsutum	351	40.688	-2.5	5.966	-0.968
Gh_A12G1990	GhNAC116	IV	A12	82692043	82693296	3	Gossypium hirsutum	350	40.735	1	6.624	-0.879
Gh_D12G2169	GhNAC238	IV	D12	54743921	54745178	3	Gossypium hirsutum	350	40.737	1.5	6.697	-0.854
Gh_D10G2512	GhNAC268	III	scaffold4401_D10	63782	65037	3	Gossypium hirsutum	360	40.922	-8.5	4.93	-0.651
Gh_D01G0847	GhNAC133	V	D01	13875675	13877182	3	Gossypium hirsutum	366	40.945	0	6.508	-0.322
Gh_A01G0819	GhNAC008	V	A01	18709584	18711083	3	Gossypium hirsutum	366	40.951	0.5	6.595	-0.335
Gh_A08G1552	GhNAC063	IV	A08	93199519	93200931	3	Gossypium hirsutum	357	41.51	1.5	6.734	-0.855
Gh_A09G0920	GhNAC077	VIII	A09	57980190	57981647	4	Gossypium hirsutum	371	41.536	8	8.383	-0.52
Gh_D08G1858	GhNAC193	IV	D08	55907949	55909361	3	Gossypium hirsutum	357	41.596	2.5	6.902	-0.887
Gh_D10G2319	GhNAC214	III	D10	61409524	61410766	3	Gossypium hirsutum	358	41.607	0	6.529	-0.914
Gh_D09G0950	GhNAC205	VIII	D09	35011570	35013026	4	Gossypium hirsutum	371	41.625	8	8.463	-0.52
Gh_A10G2008	GhNAC087	III	A10	97850463	97851766	3	Gossypium hirsutum	366	42.005	-1.5	6.189	-0.794
Gh_A10G2021	GhNAC088	III	A10	97994358	97995645	3	Gossypium hirsutum	366	42.065	-1.5	6.191	-0.747
Gh_A03G1986	GhNAC250	IV	scaffold498_A03	43148	45035	3	Gossypium hirsutum	363	42.161	5	7.018	-0.839
Gh_D13G0769	GhNAC241	I	D13	12662869	12664217	3	Gossypium hirsutum	380	42.405	7.5	8.207	-0.497
Gh_A13G0655	GhNAC120	I	A13	18567229	18568561	3	Gossypium hirsutum	380	42.517	6.5	8.006	-0.486
Gh_D11G1062	GhNAC222	IV	D11	9535168	9536636	3	Gossypium hirsutum	377	43.003	2	6.745	-0.835
Gh_A11G0915	GhNAC099	IV	A11	9677503	9678997	3	Gossypium hirsutum	377	43.051	2	6.745	-0.837
Gh_A11G2168	GhNAC105	III	A11	72018424	72020038	2	Gossypium hirsutum	382	43.095	6	8.113	-0.557
Gh_D02G1257	GhNAC137	I	D02	40929112	40930467	3	Gossypium hirsutum	387	43.107	3.5	7.25	-0.416
Gh_A11G0386	GhNAC095	IV	A11	3535555	3538250	4	Gossypium hirsutum	375	43.124	-8	5.14	-0.778
Gh_A03G0874	GhNAC018	I	A03	55262246	55263606	3	Gossypium hirsutum	387	43.182	4.5	7.556	-0.45
Gh_D11G0448	GhNAC219	IV	D11	3751622	3754290	4	Gossypium hirsutum	376	43.252	-9	5.047	-0.771
Gh_A09G0159	GhNAC072	I	A09	4213923	4215278	3	Gossypium hirsutum	386	43.357	3	7.153	-0.616
Gh_D09G0151	GhNAC200	I	D09	4218259	4219616	3	Gossypium hirsutum	386	43.357	5.5	7.696	-0.618
Gh_A08G2042	GhNAC067	IV	A08	101559590	101563910	3	Gossypium hirsutum	388	43.831	8	7.517	-0.889
Gh_D08G2434	GhNAC196	IV	D08	64244391	64248675	3	Gossypium hirsutum	389	43.878	8	7.517	-0.901
Gh_D05G1697	GhNAC161	V	D05	15244288	15246914	3	Gossypium hirsutum	395	43.944	-1.5	6.29	-0.414
Gh_A05G1526	GhNAC033	V	A05	15548238	15550714	3	Gossypium hirsutum	395	43.987	-1	6.351	-0.403
Gh_D12G2359	GhNAC239	IV	D12	56713879	56715220	3	Gossypium hirsutum	388	44.14	5	7.162	-0.712
Gh_A12G2179	GhNAC117	IV	A12	84614688	84616029	3	Gossypium hirsutum	388	44.196	5	7.288	-0.786
Gh_A02G0977	GhNAC013	IV	A02	41481288	41482619	3	Gossypium hirsutum	393	44.235	0	6.506	-0.774
Gh_D03G0775	GhNAC144	IV	D03	26623497	26624822	3	Gossypium hirsutum	393	44.266	0	6.505	-0.751
Gh_D11G1073	GhNAC223	IX	D11	9767923	9769652	6	Gossypium hirsutum	394	44.967	-10	4.914	-0.696
Gh_A11G0931	GhNAC100	IX	A11	9961332	9963070	6	Gossypium hirsutum	394	45.221	-8	5.083	-0.703
Gh_A07G1811	GhNAC055	IX	A07	73047605	73049149	5	Gossypium hirsutum	403	45.423	-21.5	4.478	-0.704
Gh_D07G2014	GhNAC185	IX	D07	49928265	49929810	5	Gossypium hirsutum	402	45.472	-24.5	4.438	-0.688
Gh_D05G0797	GhNAC158	VIII	D05	6625704	6628855	4	Gossypium hirsutum	410	45.802	8	8.603	-0.631
Gh_A06G2114	GhNAC256	I	scaffold1584_A06	69520	71363	3	Gossypium hirsutum	403	45.813	1	6.8	-0.701
Gh_D06G1277	GhNAC173	I	D06	36369442	36371286	3	Gossypium hirsutum	404	45.841	2	7.13	-0.703
Gh_A05G0652	GhNAC030	VIII	A05	6861644	6864793	4	Gossypium hirsutum	410	45.849	8	8.522	-0.637
Gh_D08G1172	GhNAC190	IV	D08	37231102	37233445	3	Gossypium hirsutum	405	46.039	-2.5	6.232	-0.728
Gh_A08G0961	GhNAC060	IV	A08	63822925	63824348	3	Gossypium hirsutum	406	46.107	-5	5.876	-0.724
Gh_D09G1785	GhNAC209	IV	D09	45457855	45459278	3	Gossypium hirsutum	406	46.394	0	6.51	-0.779
Gh_A09G2371	GhNAC259	IV	scaffold2295_A09	53429	54837	3	Gossypium hirsutum	406	46.413	1.5	6.7	-0.768
Gh_D12G1169	GhNAC233	IV	D12	39013071	39014499	3	Gossypium hirsutum	411	46.815	3.5	6.981	-0.61
Gh_A12G1049	GhNAC110	IV	A12	62729812	62731243	3	Gossypium hirsutum	411	46.83	3	6.875	-0.619
Gh_D08G2092	GhNAC195	IX	D08	59779417	59781585	6	Gossypium hirsutum	415	47.486	-27	4.433	-0.661
Gh_D05G0270	GhNAC157	XI	D05	2418896	2422359	6	Gossypium hirsutum	423	47.689	20.5	8.293	NA
Gh_D10G0792	GhNAC212	I	D10	9563597	9565687	3	Gossypium hirsutum	419	47.766	4.5	7.359	-0.865
Gh_A10G0607	GhNAC083	I	A10	9255105	9257190	3	Gossypium hirsutum	421	47.96	5	7.392	-0.867
Gh_A12G1557	GhNAC113	XI	A12	75687049	75690100	6	Gossypium hirsutum	432	48.94	-22.5	4.637	-0.916
Gh_A05G3555	GhNAC042	VII	A05	91245948	91249773	5	Gossypium hirsutum	442	49.144	2.5	6.906	-0.644
Gh_A08G1086	GhNAC061	IX	A08	74959326	74963287	7	Gossypium hirsutum	430	49.215	-13	4.984	-0.823
Gh_D12G1684	GhNAC235	XI	D12	48663354	48666435	6	Gossypium hirsutum	436	49.329	-22	4.633	-0.9
Gh_A10G1796	GhNAC085	VII	A10	92913456	92916715	4	Gossypium hirsutum	444	49.348	-4	5.963	-0.665
Gh_D04G0050	GhNAC149	VII	D04	794201	798015	4	Gossypium hirsutum	443	49.536	1.5	6.742	-0.714
Gh_D10G2538	GhNAC269	VII	scaffold4412_D10	72810	76058	4	Gossypium hirsutum	450	50.012	-5.5	5.668	-0.646
Gh_D09G0298	GhNAC201	XI	D09	9657751	9660842	7	Gossypium hirsutum	446	50.425	-10	5.44	-0.722
Gh_A09G0294	GhNAC073	XI	A09	10219696	10222787	7	Gossypium hirsutum	446	50.587	-13.5	5.076	-0.717
Gh_D11G1074	GhNAC224	IX	D11	9771949	9773901	7	Gossypium hirsutum	451	51.303	-17	4.799	-0.703
Gh_A05G2509	GhNAC037	VII	A05	33911644	33914915	4	Gossypium hirsutum	462	51.418	-8	5.38	-0.707
Gh_D03G1542	GhNAC147	IV	D03	44638921	44660017	5	Gossypium hirsutum	446	51.54	5.5	7.038	-0.565
Gh_D05G2787	GhNAC165	VII	D05	30625280	30628550	4	Gossypium hirsutum	462	51.572	-4.5	5.933	-0.732
Gh_A07G1218	GhNAC052	XII	A07	27148026	27151031	7	Gossypium hirsutum	460	52.162	-1	6.402	-0.754
Gh_A05G0197	GhNAC029	XI	A05	2051721	2055638	6	Gossypium hirsutum	464	52.204	11	7.054	-0.799
Gh_A06G0601	GhNAC043	XI	A06	15466400	15470037	6	Gossypium hirsutum	473	53.471	6.5	6.831	-0.947
Gh_D06G0681	GhNAC171	XI	D06	11757574	11761209	6	Gossypium hirsutum	473	53.472	6.5	6.831	-0.961
Gh_A10G1944	GhNAC086	IX	A10	96771918	96777073	3	Gossypium hirsutum	478	53.783	-12	4.835	-0.617
Gh_D07G1320	GhNAC182	XII	D07	21000792	21003727	7	Gossypium hirsutum	474	54.361	-3	6.208	-0.714
Gh_A08G1743	GhNAC065	IX	A08	97405128	97407520	6	Gossypium hirsutum	481	54.764	-26.5	4.494	-0.736
Gh_D08G1370	GhNAC191	IX	D08	44842294	44845689	5	Gossypium hirsutum	489	56.109	-3.5	6.207	-0.748
Gh_D09G1773	GhNAC208	II	D09	45356763	45359453	6	Gossypium hirsutum	520	58.105	-29	4.459	-0.602
Gh_A11G0147	GhNAC091	II	A11	1433195	1435110	5	Gossypium hirsutum	521	58.225	-6.5	5.558	-0.486
Gh_D11G0160	GhNAC215	II	D11	1415936	1417864	5	Gossypium hirsutum	524	58.63	-3.5	6.014	-0.488
Gh_A01G0073	GhNAC002	III	A01	609071	612483	3	Gossypium hirsutum	549	60.482	-17.5	4.597	-0.731
Gh_D01G0073	GhNAC128	III	D01	515002	517924	3	Gossypium hirsutum	550	60.669	-18.5	4.562	-0.71
Gh_D08G1138	GhNAC189	II	D08	35422894	35425194	5	Gossypium hirsutum	555	61.78	-8.5	5.316	-0.485
Gh_A09G1677	GhNAC081	II	A09	70294470	70296663	5	Gossypium hirsutum	559	62.35	-24.5	4.577	-0.449
Gh_A08G0932	GhNAC059	II	A08	59892635	59894971	5	Gossypium hirsutum	562	62.657	-5	5.829	-0.469
Gh_D05G2784	GhNAC164	VII	D05	30599641	30602690	6	Gossypium hirsutum	591	66.238	-34	4.452	-0.609
Gh_A05G2506	GhNAC036	VII	A05	33889372	33892422	6	Gossypium hirsutum	591	66.269	-34	4.452	-0.612
Gh_D05G2348	GhNAC163	VII	D05	23246457	23249459	6	Gossypium hirsutum	592	66.789	-20	4.642	-0.59
Gh_A08G0336	GhNAC058	VI	A08	4028572	4032453	6	Gossypium hirsutum	605	68.887	-13.5	5.224	-0.534
Gh_D08G0433	GhNAC188	VI	D08	4473037	4476873	6	Gossypium hirsutum	606	68.942	-14.5	5.092	-0.548
Gh_D03G0824	GhNAC145	II	D03	28123997	28126688	6	Gossypium hirsutum	635	70.764	-19.5	4.771	-0.602
Gh_D02G0682	GhNAC135	VII	D02	9653107	9656006	4	Gossypium hirsutum	631	70.819	-18	4.796	-0.57
Gh_A02G0941	GhNAC012	II	A02	38809428	38812119	6	Gossypium hirsutum	635	70.845	-16	4.931	-0.6
Gh_A02G0634	GhNAC010	VII	A02	10070348	10073252	4	Gossypium hirsutum	631	71.088	-13.5	5.056	-0.582
Gh_A05G2095	GhNAC035	VII	A05	23631555	23634565	4	Gossypium hirsutum	651	73.699	-21.5	4.636	-0.603
Gh_A11G1568	GhNAC102	VI	A11	22804683	22807732	6	Gossypium hirsutum	655	74.237	-5	5.995	-0.463
Gh_D11G1725	GhNAC225	VI	D11	18942211	18945288	6	Gossypium hirsutum	656	74.362	-9.5	5.514	-0.438
Gh_A01G0250	GhNAC004	V	A01	2406367	2419508	17	Gossypium hirsutum	704	77.554	10.5	7.931	-0.336
Gh_D12G2375	GhNAC240	II	D12	56815551	56819403	9	Gossypium hirsutum	859	94.148	-30.5	4.668	-0.63
Gh_A12G2195	GhNAC118	II	A12	84723403	84727276	9	Gossypium hirsutum	860	94.324	-32	4.626	-0.601

## Sheet: At_NAC
Transcript_ID	NAC_ID	Group
AT1G01720.1	ANAC002	III
AT1G12260.1	ANAC007	IV
AT1G25580.1	ANAC008	IX
AT1G32770.1	ANAC012	IV
AT1G33060.1	ANAC014	II
AT1G34190.1	ANAC017	VI
AT1G61110.1	ANAC025	III
AT1G69490.1	ANAC029	III
AT1G71930.1	ANAC030	IV
AT1G76420.1	ANAC031	V
AT1G79580.1	ANAC033	IV
AT2G02450.1	ANAC035	I
AT2G17040.1	ANAC036	I
AT2G18060.1	ANAC037	IV
AT2G24430.1	ANAC039	V
AT2G27300.1	ANAC040	VII
AT2G33480.1	ANAC041	II
AT2G43000.1	ANAC042	I
AT2G46770.1	ANAC043	IV
AT3G01600.1	ANAC044	IX
AT3G04070.1	ANAC047	III
AT3G10480.1	ANAC050	VI
AT3G15510.1	ANAC056	III
AT3G18400.1	ANAC058	V
AT4G10350.1	ANAC070	IV
AT5G04410.1	ANAC078	VI
AT5G08790.1	ANAC081	III
AT5G09330.1	ANAC082	VI
AT5G13180.1	ANAC083	II
AT5G14000.1	ANAC084	VIII
AT5G14490.1	ANAC085	IX
AT5G18270.1	ANAC087	V
AT5G22290.1	ANAC089	VII
