# Supplementary material for: Genome-Wide Identification of the NAC Transcription Factors in Gossypium hirsutum and Analysis of Their Responses to Verticillium wilt
Source: Plants (Basel). 2022 Oct 10;11(19):2661. doi: 10.3390/plants11192661 (PMC9571985; doi:10.3390/plants11192661)
Supplement: Supplementary file 1 [file plants-11-02661-s001.zip › Table S2 Segmental and tandem duplications of GhNAC gene pairs.xlsx]

## Sheet: Sheet1
Supplementary Table S2. Segmental and tandem duplications of GhNAC gene pairs
Duplication gene pair		Chromosome	Duplicaiton type
GhNAC031	GhNAC159	A05/D05	segmental
GhNAC031	GhNAC174	A05/D06	segmental
GhNAC122	GhNAC243	A13/D13	segmental
GhNAC123	GhNAC244	A13/D13	segmental
GhNAC085	GhNAC269	A10/scaffold4412_D10	segmental
GhNAC038	GhNAC154	A05/D04	segmental
GhNAC199	GhNAC071	D09/A09	segmental
GhNAC202	GhNAC074	D09/A09	segmental
GhNAC192	GhNAC062	D08/A08	segmental
GhNAC193	GhNAC063	D08/A08	segmental
GhNAC193	GhNAC238	D08/D12	segmental
GhNAC193	GhNAC116	D08/A12	segmental
GhNAC238	GhNAC116	D12/A12	segmental
GhNAC238	GhNAC063	D12/A08	segmental
GhNAC237	GhNAC115	D12/A12	segmental
GhNAC237	GhNAC062	D12/A08	segmental
GhNAC237	GhNAC148	D12/D03	segmental
GhNAC237	GhNAC016	D12/A03	segmental
GhNAC019	GhNAC138	A03/D02	segmental
GhNAC019	GhNAC271	A03/D12	segmental
GhNAC019	GhNAC112	A03/A12	segmental
GhNAC018	GhNAC137	A03/D02	segmental
GhNAC006	GhNAC131	A01/D01	segmental
GhNAC006	GhNAC106	A01/A11	segmental
GhNAC006	GhNAC229	A01/D11	segmental
GhNAC010	GhNAC135	A02/D02	segmental
GhNAC145	GhNAC012	D03/A02	segmental
GhNAC144	GhNAC013	D03/A02	segmental
GhNAC148	GhNAC016	D03/A03	segmental
GhNAC148	GhNAC115	D03/A12	segmental
GhNAC044	GhNAC172	A06/D06	segmental
GhNAC232	GhNAC109	D12/A12	segmental
GhNAC014	GhNAC143	A02/D03	segmental
GhNAC015	GhNAC142	A02/D03	segmental
GhNAC026	GhNAC155	A04/D04	segmental
GhNAC231	GhNAC108	D12/A12	segmental
GhNAC231	GhNAC022	D12/A03	segmental
GhNAC162	GhNAC034	D05/A05	segmental
GhNAC177	GhNAC046	D06/A06	segmental
GhNAC177	GhNAC047	D06/A06	segmental
GhNAC051	GhNAC181	A07/D07	segmental
GhNAC053	GhNAC183	A07/D07	segmental
GhNAC053	GhNAC222	A07/D11	segmental
GhNAC053	GhNAC099	A07/A11	segmental
GhNAC255	GhNAC174	scaffold1341_A06/D06	segmental
GhNAC146	GhNAC017	D03/A03	segmental
GhNAC146	GhNAC048	D03/A07	segmental
GhNAC139	GhNAC020	D02/A03	segmental
GhNAC139	GhNAC021	D02/A03	segmental
GhNAC139	GhNAC156	D02/D04	segmental
GhNAC139	GhNAC027	D02/A04	segmental
GhNAC195	GhNAC065	D08/A08	segmental
GhNAC149	GhNAC042	D04/A05	segmental
GhNAC104	GhNAC227	A11/D11	segmental
GhNAC105	GhNAC228	A11/D11	segmental
GhNAC054	GhNAC184	A07/D07	segmental
GhNAC054	GhNAC186	A07/D07	segmental
GhNAC054	GhNAC260	A07/A11	segmental
GhNAC054	GhNAC270	A07/D11	segmental
GhNAC130	GhNAC005	D01/A01	segmental
GhNAC059	GhNAC189	A08/D08	segmental
GhNAC117	GhNAC239	A12/D12	segmental
GhNAC118	GhNAC240	A12/D12	segmental
GhNAC037	GhNAC165	A05/D05	segmental
GhNAC036	GhNAC164	A05/D05	segmental
GhNAC058	GhNAC188	A08/D08	segmental
GhNAC178	GhNAC048	D07/A07	segmental
GhNAC098	GhNAC221	A11/D11	segmental
GhNAC120	GhNAC241	A13/D13	segmental
GhNAC062	GhNAC115	A08/A12	segmental
GhNAC140	GhNAC119	D02/A13	segmental
GhNAC140	GhNAC230	D02/D12	segmental
GhNAC140	GhNAC107	D02/A12	segmental
GhNAC055	GhNAC185	A07/D07	segmental
GhNAC111	GhNAC234	A12/D12	segmental
GhNAC050	GhNAC180	A07/D07	segmental
GhNAC157	GhNAC029	D05/A05	segmental
GhNAC171	GhNAC043	D06/A06	segmental
GhNAC171	GhNAC029	D06/A05	segmental
GhNAC009	GhNAC134	A02/D02	segmental
GhNAC045	GhNAC175	A06/D06	segmental
GhNAC207	GhNAC080	D09/A09	segmental
GhNAC207	GhNAC179	D09/D07	segmental
GhNAC207	GhNAC049	D09/A07	segmental
GhNAC270	GhNAC260	scaffold4562_D11/A11	segmental
GhNAC270	GhNAC186	scaffold4562_D11/D07	segmental
GhNAC270	GhNAC184	scaffold4562_D11/D07	segmental
GhNAC218	GhNAC094	D11/A11	segmental
GhNAC219	GhNAC095	D11/A11	segmental
GhNAC216	GhNAC092	D11/A11	segmental
GhNAC217	GhNAC093	D11/A11	segmental
GhNAC076	GhNAC204	A09/D09	segmental
GhNAC077	GhNAC205	A09/D09	segmental
GhNAC174	GhNAC159	D06/D05	segmental
GhNAC203	GhNAC075	D09/A09	segmental
GhNAC173	GhNAC256	D06/scaffold1584_A06	segmental
GhNAC173	GhNAC212	D06/D10	segmental
GhNAC173	GhNAC083	D06/A10	segmental
GhNAC103	GhNAC226	A11/D11	segmental
GhNAC023	GhNAC167	A04/D05	segmental
GhNAC073	GhNAC201	A09/D09	segmental
GhNAC235	GhNAC113	D12/A12	segmental
GhNAC029	GhNAC043	A05/A06	segmental
GhNAC008	GhNAC133	A01/D01	segmental
GhNAC024	GhNAC166	A04/D05	segmental
GhNAC033	GhNAC161	A05/D05	segmental
GhNAC229	GhNAC106	D11/A11	segmental
GhNAC229	GhNAC131	D11/D01	segmental
GhNAC138	GhNAC271	D02/scaffold4592_D12	segmental
GhNAC138	GhNAC112	D02/A12	segmental
GhNAC102	GhNAC225	A11/D11	segmental
GhNAC091	GhNAC215	A11/D11	segmental
GhNAC213	GhNAC087	D10/A10	segmental
GhNAC213	GhNAC088	D10/A10	segmental
GhNAC214	GhNAC087	D10/A10	segmental
GhNAC214	GhNAC088	D10/A10	segmental
GhNAC132	GhNAC249	D01/scaffold38_A01	segmental
GhNAC132	GhNAC252	D01/scaffold753_A04	segmental
GhNAC132	GhNAC168	D01/D05	segmental
GhNAC131	GhNAC106	D01/A11	segmental
GhNAC108	GhNAC141	A12/D02	segmental
GhNAC027	GhNAC156	A04/D04	segmental
GhNAC027	GhNAC021	A04/A03	segmental
GhNAC027	GhNAC020	A04/A03	segmental
GhNAC084	GhNAC211	A10/D10	segmental
GhNAC084	GhNAC187	A10/D07	segmental
GhNAC084	GhNAC057	A10/A07	segmental
GhNAC083	GhNAC212	A10/D10	segmental
GhNAC083	GhNAC256	A10/scaffold1584_A06	segmental
GhNAC169	GhNAC251	D05/scaffold752_A04	segmental
GhNAC169	GhNAC007	D05/A01	segmental
GhNAC169	GhNAC261	D05/scaffold3720_D01	segmental
GhNAC168	GhNAC252	D05/scaffold753_A04	segmental
GhNAC168	GhNAC249	D05/scaffold38_A01	segmental
GhNAC200	GhNAC072	D09/A09	segmental
GhNAC179	GhNAC049	D07/A07	segmental
GhNAC179	GhNAC080	D07/A09	segmental
GhNAC112	GhNAC271	A12/scaffold4592_D12	segmental
GhNAC194	GhNAC064	D08/A08	segmental
GhNAC078	GhNAC206	A09/D09	segmental
GhNAC080	GhNAC049	A09/A07	segmental
GhNAC060	GhNAC190	A08/D08	segmental
GhNAC032	GhNAC160	A05/D05	segmental
GhNAC107	GhNAC230	A12/D12	segmental
GhNAC090	GhNAC268	A10/scaffold4401_D10	segmental
GhNAC089	GhNAC268	A10/scaffold4401_D10	segmental
GhNAC100	GhNAC223	A11/D11	segmental
GhNAC099	GhNAC222	A11/D11	segmental
GhNAC114	GhNAC236	A12/D12	segmental
GhNAC187	GhNAC057	D07/A07	segmental
GhNAC187	GhNAC211	D07/D10	segmental
GhNAC186	GhNAC056	D07/A07	segmental
GhNAC220	GhNAC096	D11/A11	segmental
GhNAC115	GhNAC016	A12/A03	segmental
GhNAC153	GhNAC039	D04/A05	segmental
GhNAC116	GhNAC063	A12/A08	segmental
GhNAC184	GhNAC260	D07/scaffold2747_A11	segmental
GhNAC069	GhNAC263	A08/scaffold4249_D08	segmental
GhNAC069	GhNAC264	A08/scaffold4249_D08	segmental
GhNAC069	GhNAC265	A08/scaffold4249_D08	segmental
GhNAC070	GhNAC264	A08/scaffold4249_D08	segmental
GhNAC070	GhNAC265	A08/scaffold4249_D08	segmental
GhNAC070	GhNAC263	A08/scaffold4249_D08	segmental
GhNAC068	GhNAC265	A08/scaffold4249_D08	segmental
GhNAC068	GhNAC264	A08/scaffold4249_D08	segmental
GhNAC068	GhNAC263	A08/scaffold4249_D08	segmental
GhNAC210	GhNAC082	D10/A10	segmental
GhNAC001	GhNAC127	A01/D01	segmental
GhNAC002	GhNAC128	A01/D01	segmental
GhNAC233	GhNAC110	D12/A12	segmental
GhNAC196	GhNAC067	D08/A08	segmental
GhNAC197	GhNAC257	D08/scaffold1922_A08	segmental
GhNAC198	GhNAC258	D08/scaffold1922_A08	segmental
GhNAC147	GhNAC250	D03/scaffold498_A03	segmental
GhNAC211	GhNAC057	D10/A07	segmental
GhNAC020	GhNAC156	A03/D04	segmental
GhNAC021	GhNAC156	A03/D04	segmental
GhNAC011	GhNAC136	A02/D02	segmental
GhNAC011	GhNAC253	A02/scaffold1269_A06	segmental
GhNAC011	GhNAC170	A02/D06	segmental
GhNAC158	GhNAC030	D05/A05	segmental
GhNAC141	GhNAC022	D02/A03	segmental
GhNAC136	GhNAC253	D02/scaffold1269_A06	segmental
GhNAC136	GhNAC170	D02/D06	segmental
GhNAC150	GhNAC041	D04/A05	segmental
GhNAC151	GhNAC040	D04/A05	segmental
GhNAC212	GhNAC256	D10/scaffold1584_A06	segmental
GhNAC125	GhNAC246	A13/D13	segmental
GhNAC124	GhNAC245	A13/D13	segmental
GhNAC209	GhNAC259	D09/scaffold2295_A09	segmental
GhNAC170	GhNAC253	D06/scaffold1269_A06	segmental
GhNAC266	GhNAC066	scaffold4251_D08/A08	segmental
GhNAC254	GhNAC176	scaffold1316_A06/D06	segmental
GhNAC249	GhNAC252	scaffold38_A01/scaffold753_A04	segmental
GhNAC261	GhNAC007	scaffold3720_D01/A01	segmental
GhNAC047	GhNAC046	A06/A06	tandem
GhNAC213	GhNAC214	D10/D10	tandem
GhNAC090	GhNAC089	A10/A10	tandem
GhNAC265	GhNAC264	scaffold4249_D08/scaffold4249_D08	tandem
GhNAC265	GhNAC263	scaffold4249_D08/scaffold4249_D08	tandem
GhNAC263	GhNAC264	scaffold4249_D08/scaffold4249_D08	tandem
GhNAC020	GhNAC021	A03/A03	tandem
GhNAC070	GhNAC068	A08/A08	tandem
GhNAC069	GhNAC068	A08/A08	tandem
GhNAC069	GhNAC070	A08/A08	tandem
GhNAC186	GhNAC184	D07/D07	tandem
GhNAC088	GhNAC087	A10/A10	tandem
