# Supplementary material for: Genome-Wide Identification of the NAC Transcription Factors in Gossypium hirsutum and Analysis of Their Responses to Verticillium wilt
Source: Plants (Basel). 2022 Oct 10;11(19):2661. doi: 10.3390/plants11192661 (PMC9571985; doi:10.3390/plants11192661)
Supplement: Supplementary file 1 [file plants-11-02661-s001.zip › Table S4 GhNACs differentially expressed in J11 and Z2.xlsx]

## Sheet: NACs in J11
Supplementary Table S4. GhNACs differentially expressed in J11 and Z2
ID	Gene ID	Gene name in other species	baseMean	log2FoldChange	lfcSE	stat	pvalue	padj	J11_ck_1	J11_ck_2	J11_ck_3	J11_24_1	J11_24_2	J11_24_3
GhNAC045	Gh_A06G1226	JUB1	33.5788	-1.61011	0.39755	-4.05009	5.1198e-05	0.000465368	38.9816	45.9167	66.6621	12.4966	15.1601	22.2558
GhNAC107	Gh_A12G0118	NAM-1	30.9689	-2.4768	0.429931	-5.76093	8.36522e-09	1.64829e-07	49.7015	46.937	60.6019	9.61275	6.24239	12.7176
GhNAC040	Gh_A05G3310	NAC081	368.841	-1.072	0.141112	-7.59675	3.03652e-14	1.17237e-12	480.448	482.635	536.327	215.326	240.778	257.531
GhNAC151	Gh_D04G0293	NAC081	970.112	-1.04618	0.125631	-8.3274	8.26352e-17	4.15946e-15	1281.52	1375.46	1263.55	555.617	603.729	740.8
GhNAC020	Gh_A03G1332	NAC083	216.427	-1.56147	0.176306	-8.85659	8.24998e-19	4.99554e-17	314.776	323.457	331.29	88.4373	112.363	128.236
GhNAC139	Gh_D02G1769	NAC083	476.916	-1.30971	0.134696	-9.72345	2.39525e-22	1.90378e-20	681.203	671.404	685.811	238.396	277.341	307.342
GhNAC136	Gh_D02G0790	NAC002	447.661	-1.74956	0.143192	-12.2182	2.48409e-34	4.10178e-32	643.196	697.933	730.253	215.326	226.51	172.747
GhNAC228	Gh_D11G2469	NAM-2	443.769	-1.33429	0.131758	-10.1268	4.20044e-24	3.85957e-22	648.069	626.508	632.28	273.963	249.696	232.096
GhNAC230	Gh_D12G0132	NAM-B1	56.601	-1.91119	0.298753	-6.3972	1.58248e-10	3.96267e-09	88.6831	91.8333	87.8727	21.1481	26.7531	23.3156
GhNAC011	Gh_A02G0749	NAC002	265.002	-1.52789	0.154951	-9.86045	6.17749e-23	5.21567e-21	394.688	418.352	367.651	136.501	138.224	134.595
GhNAC142	Gh_D03G0032	NAC054	2.51101	-4.81634	1.71124	-2.81453	0.0048849	0.0231655	4.8727	9.18333	1.01003	0	0	0
GhNAC130	Gh_D01G0278	JUB1	57.1932	-1.11416	0.328862	-3.38793	0.000704229	0.00453945	85.7595	86.7315	61.6119	30.7608	23.186	55.1096
GhNAC158	Gh_D05G0797	NAC089	8.43651	5.53271	1.3772	4.01737	5.88516e-05	0.000526488	0	1.02037	0	6.72893	31.212	11.6578
GhNAC029	Gh_A05G0197	NAC073	10.9888	1.64787	0.650873	2.53179	0.0113481	0.0457771	7.79631	5.10185	3.03009	15.3804	18.7272	15.897
GhNAC242	Gh_D13G1072	NAC100	177.752	1.1366	0.180928	6.28209	3.34051e-10	7.96808e-09	109.148	113.261	111.103	213.403	268.423	251.172
GhNAC121	Gh_A13G0828	NAC100	544.501	1.04098	0.129128	8.06158	7.53167e-16	3.43905e-14	342.063	353.048	373.712	670.97	809.728	717.484
GhNAC055	Gh_A07G1811	NAC091	33.624	4.41938	0.588734	7.50657	6.06948e-14	2.25954e-12	1.94908	2.04074	5.05016	49.025	81.1511	62.5282
GhNAC025	Gh_A04G0481	NAC090	36.5458	3.39639	0.461695	7.35633	1.89028e-13	6.69727e-12	7.79631	4.08148	7.07022	50.9476	67.7746	81.6045
GhNAC223	Gh_D11G1073	NAC014	10.0048	6.7625	1.31544	5.14088	2.73462e-07	4.10358e-06	0	0	0	14.4191	22.2943	23.3156
GhNAC191	Gh_D08G1370	NAC69	48.0652	1.52744	0.321326	4.75354	1.99887e-06	2.55376e-05	20.4653	31.6315	22.2207	65.3667	71.3417	77.3653
GhNAC100	Gh_A11G0931	NAC014	122.76	5.49028	0.405087	13.5533	7.57157e-42	1.83142e-39	4.8727	6.12222	5.05016	228.783	236.319	255.412
GhNAC224	Gh_D11G1074	NAC045	119.808	6.47008	0.544774	11.8766	1.56553e-32	2.39912e-30	0	7.14259	1.01003	237.435	244.345	228.917
GhNAC123	Gh_A13G1061	NAC086	9.78735	1.81718	0.718116	2.53048	0.0113905	0.0459109	6.82178	4.08148	2.02006	9.61275	16.0519	20.1362
GhNAC150	Gh_D04G0278	NAM-B2	95.775	1.84877	0.288453	6.40927	1.46215e-10	3.68196e-09	46.7779	28.5704	49.4915	98.0501	191.731	160.03
GhNAC030	Gh_A05G0652	NAC089	14.1563	3.47233	0.746961	4.64862	3.3417e-06	4.07561e-05	0.974539	2.04074	4.04013	15.3804	33.8873	28.6146
GhNAC258	Gh_A08G2289	SMB	20.5016	1.89444	0.533573	3.55047	0.000384544	0.00271199	4.8727	6.12222	15.1505	45.1799	29.4284	22.2558
GhNAC076	Gh_A09G0913	NAC090	245.787	4.86219	0.257156	18.9075	9.88592e-80	1.02878e-76	17.5417	14.2852	17.1705	519.089	492.257	414.381
GhNAC101	Gh_A11G0932	NAC062	54.5391	6.0085	0.695655	8.63718	5.76172e-18	3.22282e-16	1.94908	3.06111	0	116.314	105.229	100.681
GhNAC052	Gh_A07G1218	NTL9	59.8718	2.40448	0.315065	7.63169	2.31699e-14	9.03928e-13	16.5672	23.4685	17.1705	103.818	112.363	85.8437
GhNAC204	Gh_D09G0943	NAC090	179.437	4.58672	0.283308	16.1899	5.94245e-59	2.7134e-56	14.6181	16.3259	12.1204	377.781	378.111	277.667
GhNAC236	Gh_D12G1761	NAC100	20.1954	1.18833	0.468127	2.53847	0.011134	0.0450677	12.669	10.2037	14.1404	29.7995	32.1037	22.2558
GhNAC182	Gh_D07G1320	NTL9	19.5075	3.42014	0.623389	5.48637	4.1028e-08	7.15759e-07	2.92362	4.08148	3.03009	45.1799	37.4544	24.3754
GhNAC264	Gh_D08G2671	JUB1	27.2626	1.08882	0.432592	2.51696	0.0118372	0.0473657	13.6436	15.3056	23.2307	30.7608	27.6449	52.99
GhNAC065	Gh_A08G1743	NAC091	15.3466	4.88242	0.96264	5.07191	3.93853e-07	5.74263e-06	0	3.06111	0	29.7995	23.186	36.0332
GhNAC084	Gh_A10G0627	NAC083	11.975	1.91114	0.640896	2.98198	0.00286395	0.0148828	3.89816	7.14259	4.04013	16.3417	16.0519	24.3754
GhNAC185	Gh_D07G2014	NAC091	21.245	3.70074	1.09672	3.37436	0.000739868	0.00472696	0.974539	8.16296	0	32.6834	34.7791	50.8704
GhNAC070	Gh_A08G2057	JUB1	13.1389	2.78459	0.701323	3.97047	7.17296e-05	0.000624831	5.84724	1.02037	3.03009	24.9932	14.2683	29.6744
GhNAC081	Gh_A09G1677	NAC062	156.635	1.0212	0.1899	5.37756	7.55026e-08	1.26208e-06	114.021	104.078	91.9129	228.783	189.055	211.96
GhNAC069	Gh_A08G2056	JUB1	3.25298	4.10164	1.53865	2.66574	0.00768202	0.033374	0	0	1.01003	7.6902	4.45885	6.3588

## Sheet: NACs in Z2
ID	Gene ID	Gene name in other species	baseMean	log2FoldChange	lfcSE	stat	pvalue	padj	Z2_ck_1	Z2_ck_2	Z2_ck_3	Z2_24_1	Z2_24_2	Z2_24_3
GhNAC136	Gh_D02G0790	NAC002	358.747	-1.149	0.206055	-5.57617	2.45877e-08	3.59525e-06	525.966	415.162	541.812	237.957	197.35	234.235
GhNAC228	Gh_D11G2469	NAM-2	412.703	-1.27484	0.22072	-5.77584	7.65702e-09	1.27346e-06	655.75	508.362	586.652	305.78	194.659	225.013
GhNAC112	Gh_A12G1505	NAC029	199.092	-1.14856	0.255495	-4.49544	6.94271e-06	0.00043591	327.875	216.054	278.38	151.741	95.0868	125.417
GhNAC230	Gh_D12G0132	NAM-B1	31.4529	-1.89435	0.54591	-3.47008	0.000520304	0.0142326	28.2987	57.1907	62.5887	24.1406	3.58818	12.9106
GhNAC011	Gh_A02G0749	NAC002	182.393	-1.04752	0.235742	-4.44351	8.85016e-06	0.000537848	224.438	230.881	282.116	117.254	102.263	137.405
GhNAC204	Gh_D09G0943	NAC090	187.337	2.57036	0.840399	3.0585	0.00222449	0.0421251	119.05	14.8272	28.0248	337.968	269.114	355.041
GhNAC081	Gh_A09G1677	NAC062	148.543	1.18407	0.244393	4.84494	1.26651e-06	0.000105118	77.0897	97.436	98.0867	182.779	209.012	226.857
GhNAC052	Gh_A07G1218	NTL9	43.5056	1.7233	0.407264	4.2314	2.32237e-05	0.00121047	12.6856	18.0045	29.8931	57.4775	64.5873	78.3856
GhNAC076	Gh_A09G0913	NAC090	226.164	2.78799	0.266495	10.4617	1.29524e-25	3.13549e-22	79.0413	48.718	43.9055	347.164	365.995	472.158
GhNAC065	Gh_A08G1743	NAC091	13.5814	4.72846	1.01012	4.6811	2.85343e-06	0.000206881	1.95164	1.05909	0	18.3928	27.8084	32.2764
GhNAC055	Gh_A07G1811	NAC091	16.0025	2.73209	0.795214	3.43567	0.000591081	0.0157775	5.85491	1.05909	5.60496	4.5982	47.5434	31.3543
GhNAC182	Gh_D07G1320	NTL9	17.1036	3.24165	0.694509	4.66754	3.04829e-06	0.000220642	2.92746	3.17726	3.73664	18.3928	43.9552	30.4321
GhNAC101	Gh_A11G0932	NAC062	32.1398	1.77501	0.547227	3.24364	0.00118011	0.0264382	12.6856	8.47269	22.4198	19.5424	43.9552	85.7631
GhNAC100	Gh_A11G0931	NAC014	95.9219	2.25778	0.392197	5.75674	8.57528e-09	1.41076e-06	39.0327	31.7726	28.9589	68.973	160.571	246.223
GhNAC224	Gh_D11G1074	NAC045	78.6789	2.91108	0.456399	6.37838	1.78972e-10	4.28491e-08	30.2504	16.9454	8.40743	58.6271	163.262	194.581
