# Supplementary material for: Genome-Wide Identification of the NAC Transcription Factors in Gossypium hirsutum and Analysis of Their Responses to Verticillium wilt
Source: Plants (Basel). 2022 Oct 10;11(19):2661. doi: 10.3390/plants11192661 (PMC9571985; doi:10.3390/plants11192661)
Supplement: Supplementary file 1 [file plants-11-02661-s001.zip › Table S5 Primers used in the study.xlsx]

## Sheet: Sheet1
Supplementary Table S5. Primers used in the study
primers for qRT-PCR	forward 5'-3'	reverse 5'-3'
GhNAC052	GGATCGGGACAGGAATACAAA	TAGAACCAAGGCTAAAGTGAG
GhNAC076	ACCTTGTTATCCCAGTCCTCA	CAATATCCCGAAGCTGTAGTT
GhNAC100	ATGAATGAAGTAGGGAGCAG	GAATAACCCATCGTGTAAGA
GhNAC055	TAAGTCCTGTAGTTCGGTTCT	AAGGTATTCCTAATCCCTCAA
GhNAC204	TGGCTGCTCCTCCTAAGTTG	TCGGCTGGATTATAGTGGTCTC
GhNAC136	TGCCGTAAATGTGCGTCTCAG	TCACCGTACAACGCCAAATCA
GhNAC228	AATGGCAGATAGAAGAGGAG	TGAAGTTGGAATTAGGGTTA
GhNAC230	CGGCAATGGGTACTGGAAGC	GCGTTTGGACGATTTGGTGG
GhUBQ7	GAAGGCATTCCACCTGACCAAC	CTTGACCTTCTTCTTGTGCTTG
primers for subcellular localization	forward 5'-3'	reverse 5'-3'
GhNAC204	CACCATGGAGGTGGCCATCGGTTT	TATTTCATTAATTTGTCCCA
primers for VIGS	forward 5'-3'	reverse 5'-3'
GhNAC204	aaggttaccgaattctctagaTCGTCGGACGATCGAGTGATC	cgtgagctcggtaccggatccCCATCCTATGGCATGTTCTTC
